# Supplementary material
Source: PubMed Central journal article supplement (PMC4312417)

A

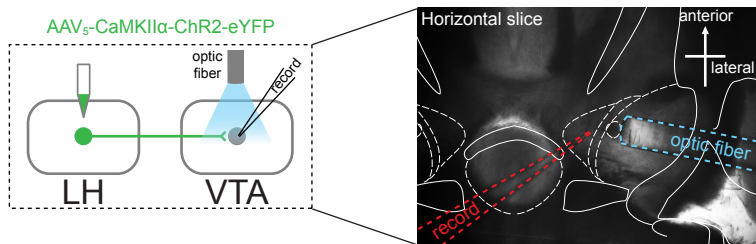

## Dopamine Neurons

B

## Net effect

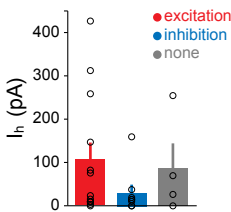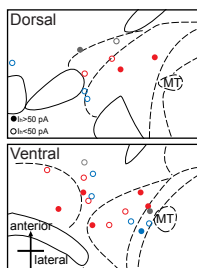

C

## Monosynaptic input

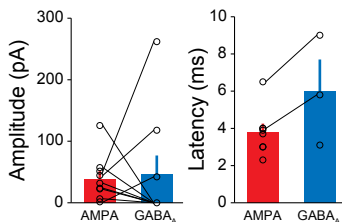

## GABA Neurons

D

## Net effect

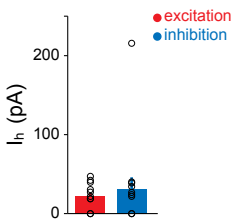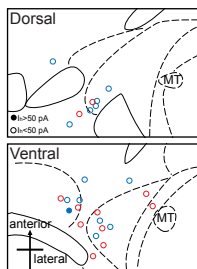

E

## Monosynaptic input

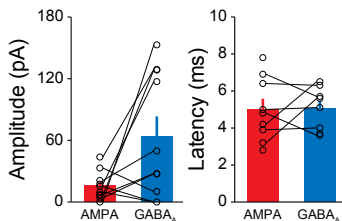

Supplement: NIHMS654891-supplement-5.pdf [file NIHMS654891-supplement-5.pdf]
