# Supplementary material
Source: PubMed Central journal article supplement (PMC4312417)

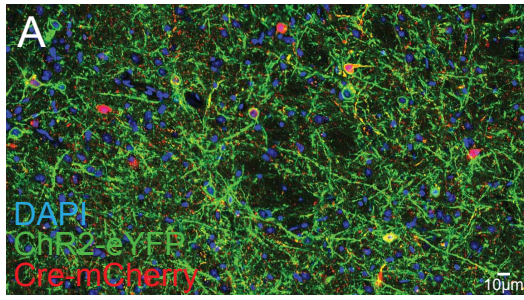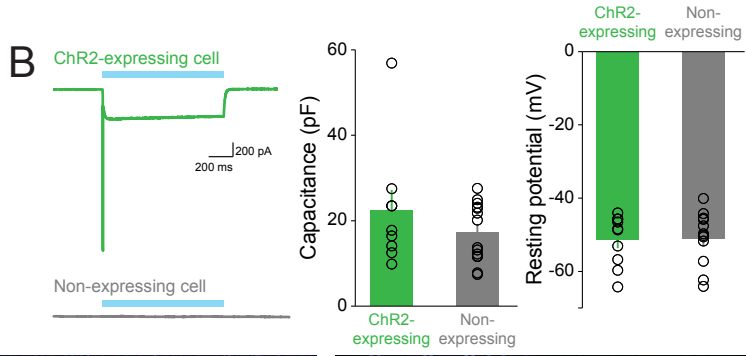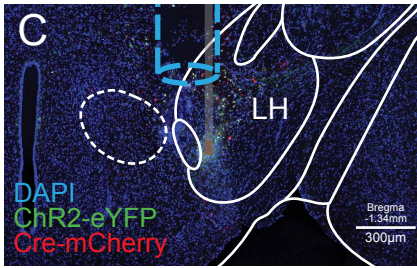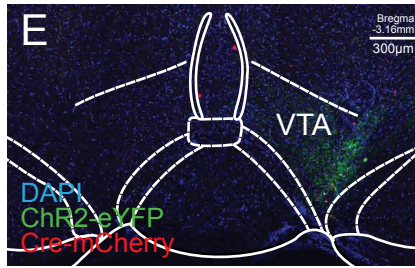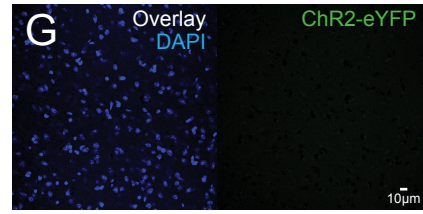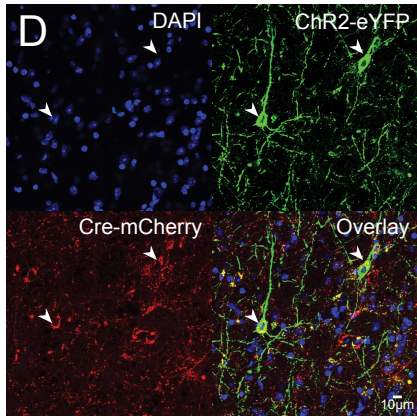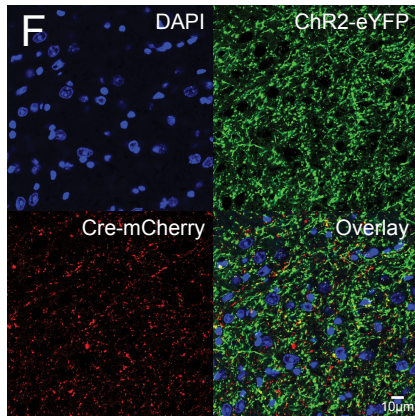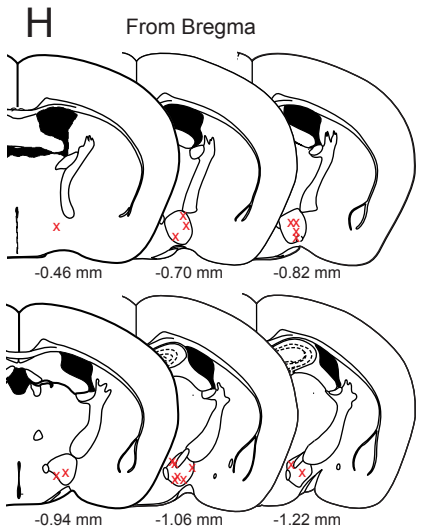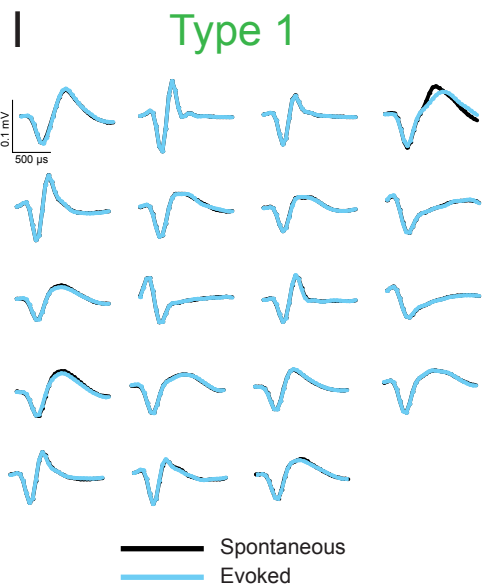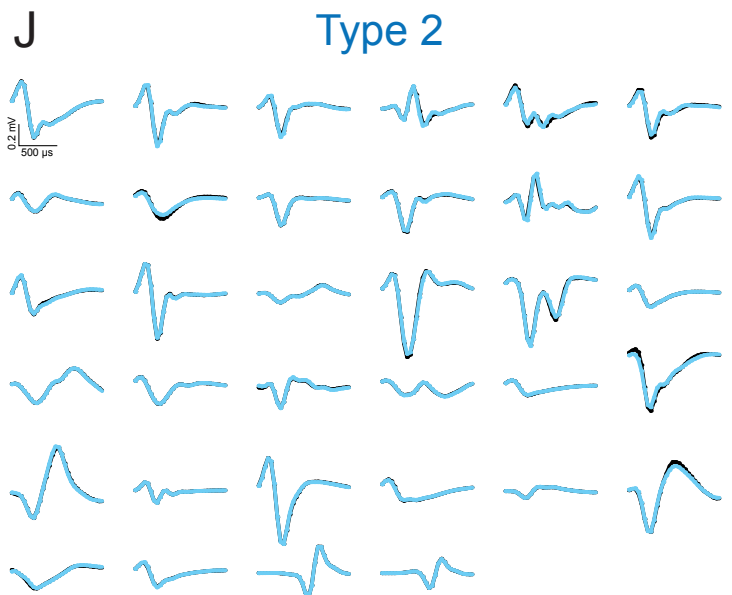

Supplement: NIHMS654891-supplement-1.pdf [file NIHMS654891-supplement-1.pdf]

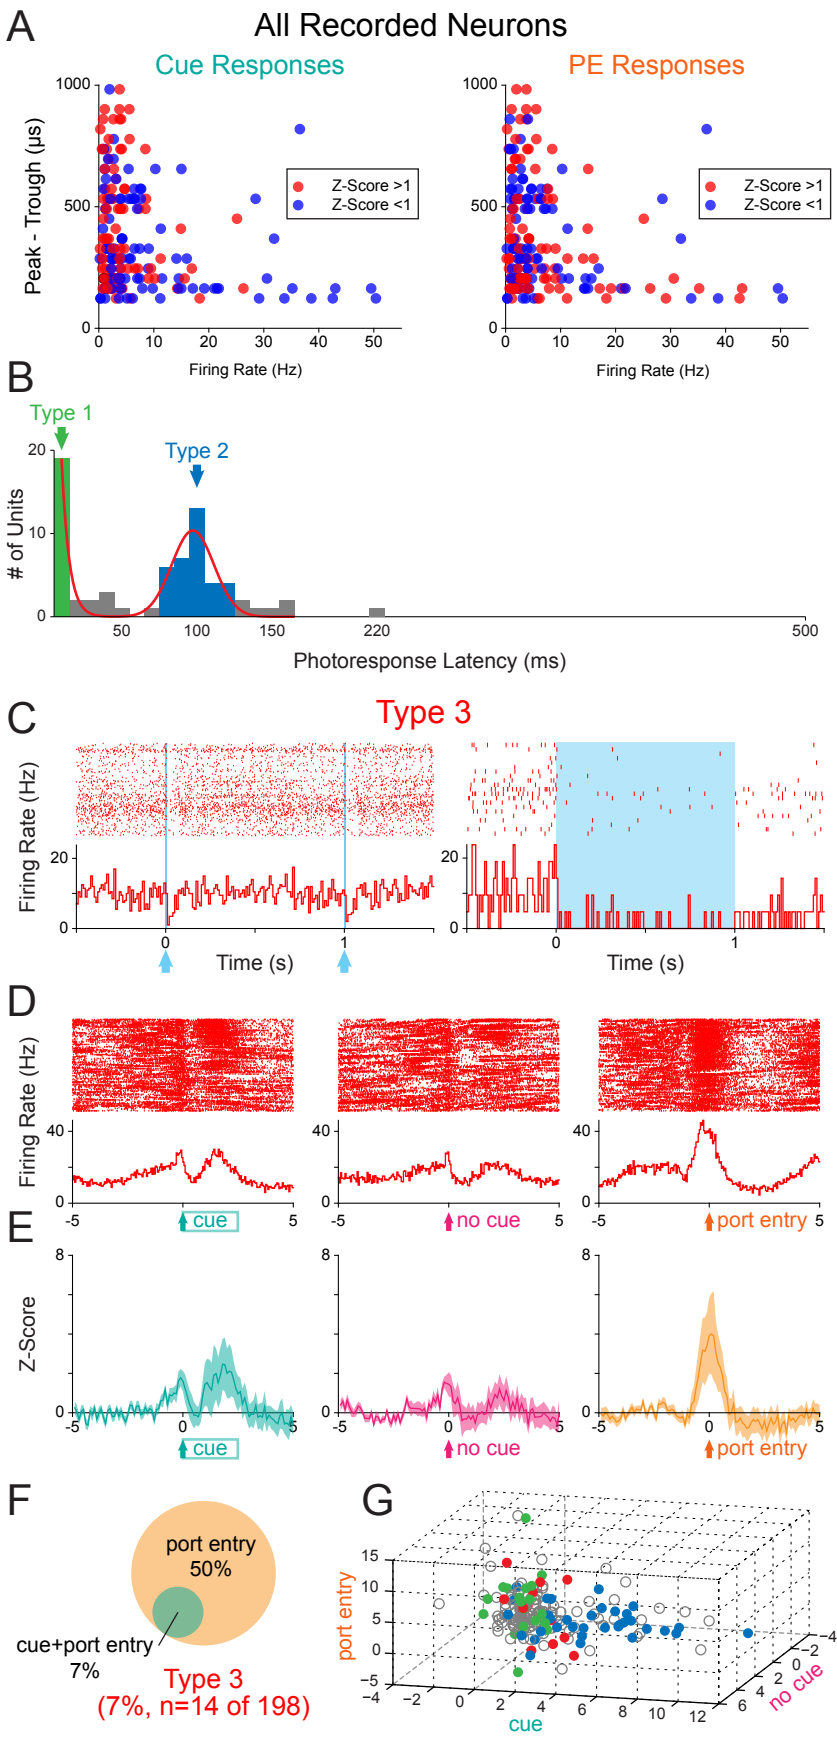

Supplement: NIHMS654891-supplement-2.pdf [file NIHMS654891-supplement-2.pdf]

# Nieh et al. Figure S3

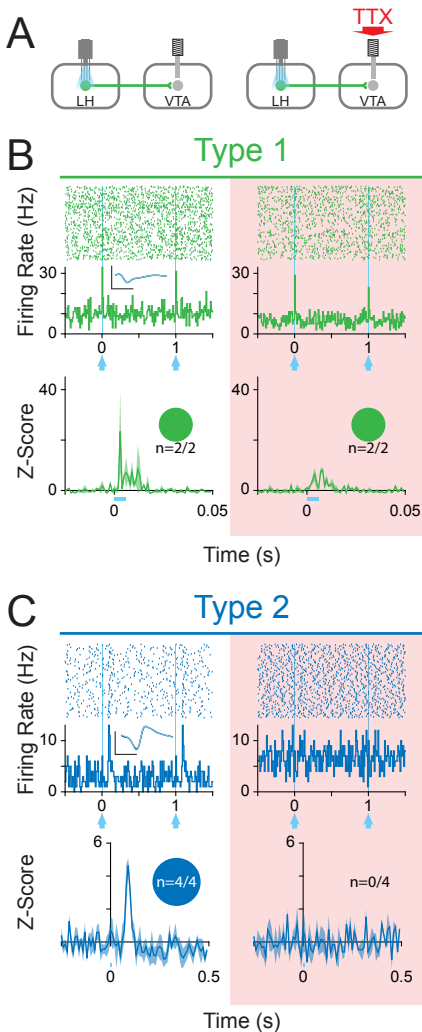

Supplement: NIHMS654891-supplement-3.pdf [file NIHMS654891-supplement-3.pdf]

**A**

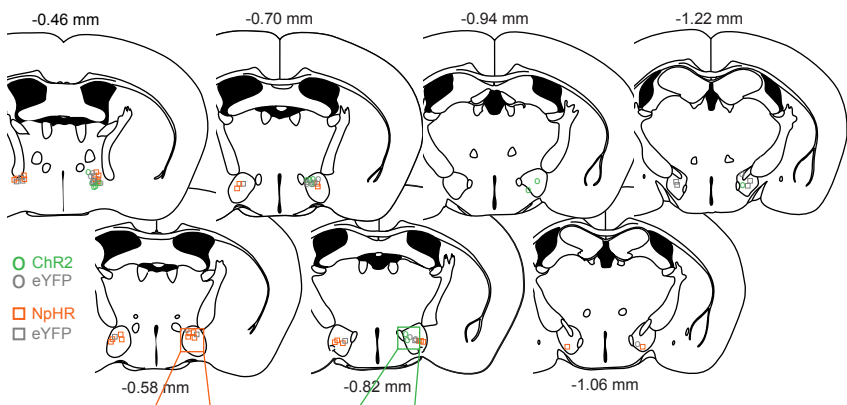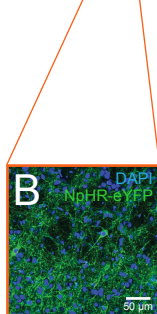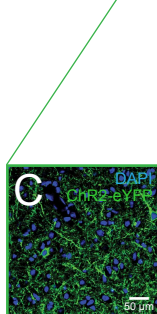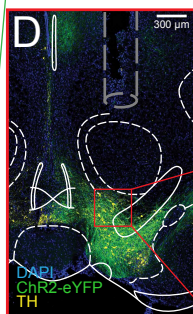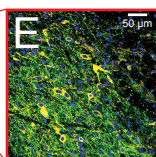

**F**

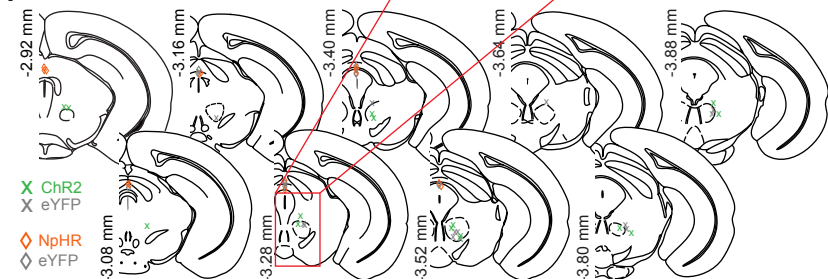

Within Session Extinction

**G**

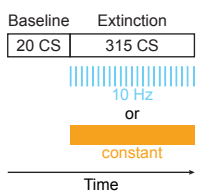

**H**

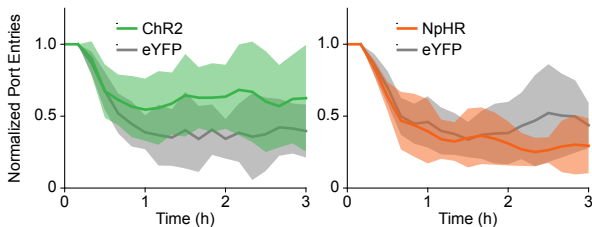

**I**

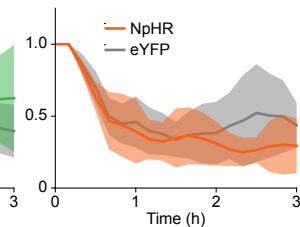

**J**

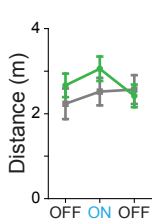

**K**

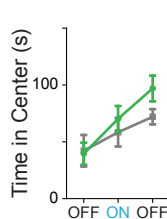

**L**

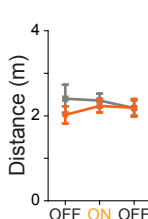

**M**

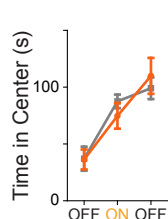

Supplement: NIHMS654891-supplement-4.pdf [file NIHMS654891-supplement-4.pdf]

## Dopamine Neurons

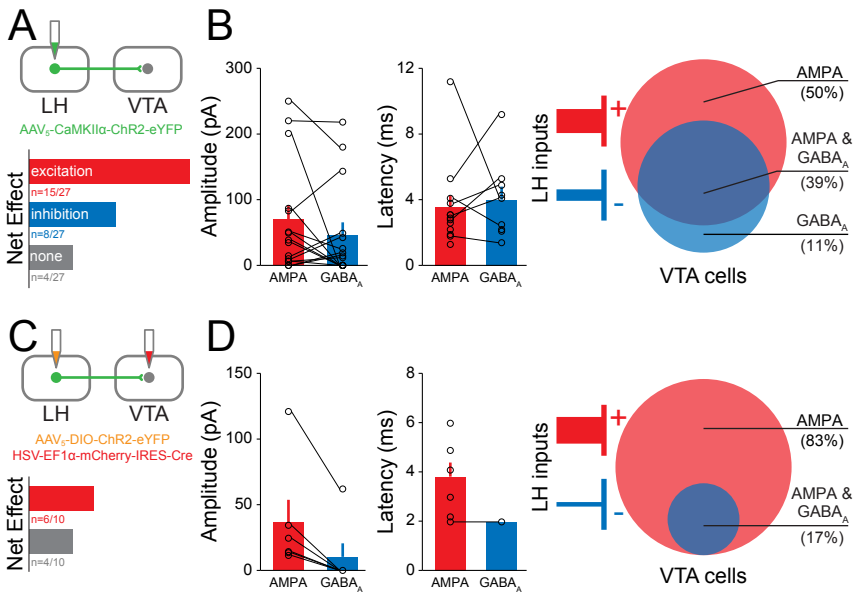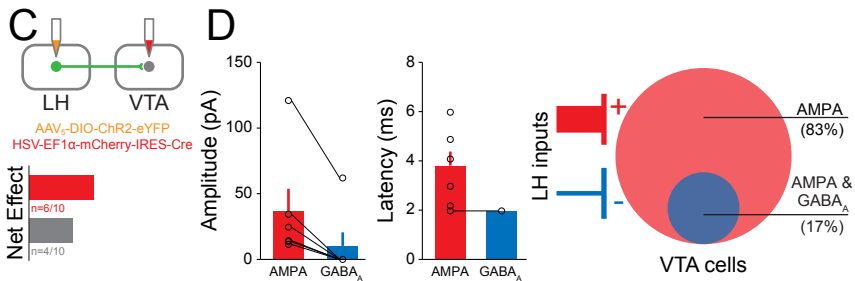

## TH- Neurons

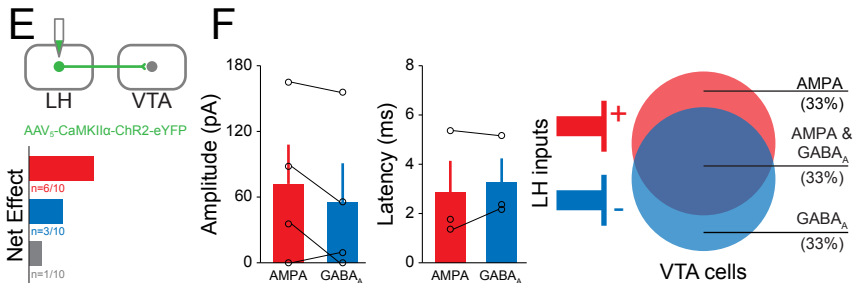

Supplement: NIHMS654891-supplement-6.pdf [file NIHMS654891-supplement-6.pdf]

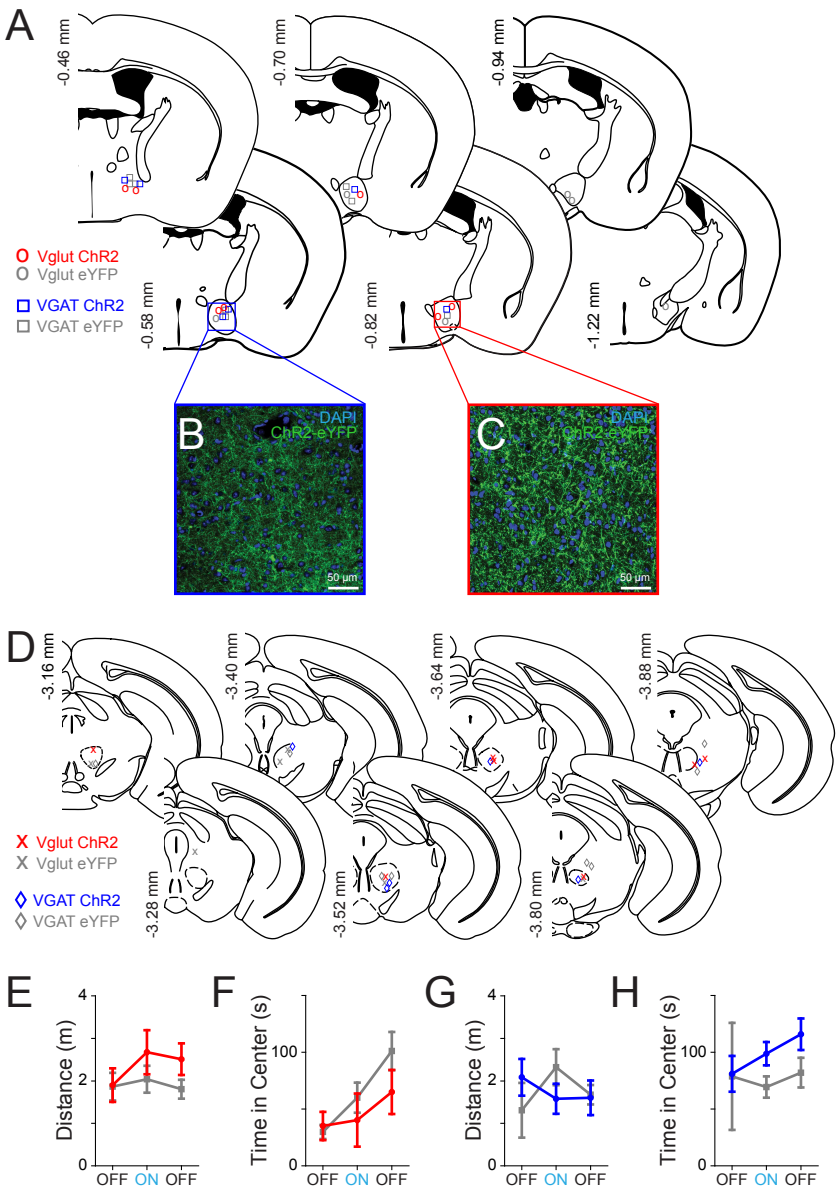

Supplement: NIHMS654891-supplement-7.pdf [file NIHMS654891-supplement-7.pdf]
